# Supplementary material for: Identification of fatty acid binding protein 4 as an adipokine that regulates insulin secretion during obesity
Source: PubMed Central journal article supplement — Mol Metab. 2014 Mar 14;3(4):465–73. doi: 10.1016/j.molmet.2014.02.005 (PMC4060222; doi:10.1016/j.molmet.2014.02.005), 2014-03-14
Supplement: mmc2.pdf [file mmc2.pdf]

# Table S1, related to Figure 1

a

| Gene nomenclature                                       |         | Mass spectrometry results/hits: |          |              |                     |                       | SecretomeP annotation/potential for secretion. |          |                         |            |
|---------------------------------------------------------|---------|---------------------------------|----------|--------------|---------------------|-----------------------|------------------------------------------------|----------|-------------------------|------------|
| Name                                                    | Symbol  | Swissprot Accession #           | MS Score | Protein Mass | Ratio H/L (Hpx/Nmx) | # peptides identified | Classical secretion                            |          | Non-classical secretion |            |
|                                                         |         |                                 |          |              |                     |                       | Signal peptide prediction                      | NN-score | Odds                    | Potential: |
| SPARC-like 1                                            | Sparcl1 | SPRL1_MOUSE                     | 633      | 72270        | 37.84               | 13                    | Yes                                            | 0.594    | 1.349                   | Maybe      |
| collagen, type VI, alpha 1                              | Col6a1  | CO6A1_MOUSE                     | 584      | 108422       | 2.167               | 11                    | Yes                                            | 0.191    | 0.376                   | No         |
| fatty acid binding protein 4                            | Fabp4   | FABP4_MOUSE                     | 1560     | 14641        | 1.524               | 11                    | No                                             | 0.755    | 2.687                   | Yes        |
| ectonucleotide pyrophosphatase/phosphodiesterase 2      | Enpp2   | ENPP2_MOUSE                     | 546      | 98821        | 1.152               | 12                    | Yes                                            | 0.435    | 0.843                   | No         |
| collagen, type VI, alpha 2                              | Col6a2  | CO6A2_MOUSE                     | 631      | 110266       | 0.9343              | 11                    | Yes                                            | 0.177    | 0.352                   | No         |
| biglycan                                                | Bgn     | PGS1_MOUSE                      | 694      | 41613        | 0.7851              | 7                     | Yes                                            | 0.715    | 2.191                   | Yes        |
| prolyl 4-hydroxylase, beta polypeptide                  | P4hb    | PDIA1_MOUSE                     | 273      | 57108        | 0.7519              | 7                     | Yes                                            | 0.731    | 2.457                   | Yes        |
| collagen, type IV, alpha 2                              | Col4a2  | CO4A2_MOUSE                     | 189      | 167220       | 0.6334              | 6                     | Yes                                            | 0.093    | 0.205                   | No         |
| vimentin                                                | Vim     | VIME_MOUSE                      | 1504     | 53655        | 0.5564              | 15                    | No                                             | 0.728    | 2.445                   | Yes        |
| heat shock protein 5                                    | Hspa5   | GRP78_MOUSE                     | 1468     | 72377        | 0.5261              | 15                    | Yes                                            | 0.753    | 2.685                   | Yes        |
| protein disulfide isomerase associated 4                | Pdia4   | PDIA4_MOUSE                     | 545      | 71929        | 0.4923              | 10                    | Yes                                            | 0.523    | 1.133                   | Maybe      |
| collagen, type III, alpha 1                             | Col3a1  | CO3A1_MOUSE                     | 825      | 138858       | 0.4809              | 14                    | Yes                                            | 0.536    | 1.152                   | Maybe      |
| calumenin                                               | Calu    | CALU_MOUSE                      | 253      | 37041        | 0.471               | 6                     | Yes                                            | 0.756    | 2.555                   | Yes        |
| haptoglobin                                             | Hp      | HPT_MOUSE                       | 588      | 38727        | 0.3281              | 5                     | Yes                                            | 0.72     | 2.178                   | Yes        |
| collagen, type I, alpha 2                               | Col1a2  | CO1A2_MOUSE                     | 4000     | 129478       | 0.3274              | 39                    | Yes                                            | 0.22     | 0.421                   | No         |
| adiponectin                                             | Adipoq  | ADIPO_MOUSE                     | 1050     | 26824        | 0.3112              | 8                     | Yes                                            | 0.871    | 4.854                   | Yes        |
| complement component 3                                  | C3      | CO3_MOUSE                       | 4717     | 186365       | 0.2916              | 55                    | Yes                                            | 0.233    | 0.465                   | No         |
| secreted acidic cysteine rich glycoprotein              | Sparc   | SPRC_MOUSE                      | 259      | 34428        | 0.2794              | 6                     | Yes                                            | 0.921    | 6.384                   | Yes        |
| collagen, type I, alpha 1                               | Col1a1  | CO1A1_MOUSE                     | 1237     | 137948       | 0.2321              | 16                    | Yes                                            | 0.174    | 0.35                    | No         |
| lipoprotein lipase                                      | Lpl     | LIPL_MOUSE                      | 569      | 53093        | 0.2292              | 7                     | Yes                                            | 0.83     | 3.849                   | Yes        |
| retinoic acid receptor responder (tazarotene induced) 2 | Rarres2 | RARR2_MOUSE                     | 338      | 18338        | 0.04245             | 5                     | Yes                                            | 0.959    | 7.326                   | Yes        |

b

| Gene nomenclature                                  |         |             | Gene function                               |                                                             |          | Tissue distribution                                      |
|----------------------------------------------------|---------|-------------|---------------------------------------------|-------------------------------------------------------------|----------|----------------------------------------------------------|
| Name                                               | Symbol  | Alias       | Function                                    | Reference:                                                  | PMID:    | GeneAtlas U133A, gcrma                                   |
| SPARC-like 1                                       | Sparcl1 | Hevin       | Maintenance of extracellular matrix         | Sullivan et.al., J Biol Chem. 2006 Sep 15;281(37):27621-32  | 16844696 | Low level expression in many tissues                     |
| collagen, type VI, alpha 1                         | Col6a1  | Collagen VI | Large extracellular matrix protein          | Cheng et.al., Nat Neurosci. 2009 Feb;12(2):119-21.          | 19122666 | Highly expressed in adipocyte, smooth muscle and uterus. |
| fatty acid binding protein 4                       | Fabp4   | Ap2         | Adipocyte fatty acid binding and signalling | Hotamisligil et.al., Science. 1996 Nov 22;274(5291):1377-9. | 8910278  | Highly expressed in adipocyte.                           |
| ectonucleotide pyrophosphatase/phosphodiesterase 2 | Enpp2   | Autotaxin   | Soluble lysophospholipaseD                  | Dusaulcy et.al., J Lipid Res. 2011 Jun;52(6):1247-55.       | 21421848 | Low level expression in many tissues                     |
