# Supplementary material for: Identification of fatty acid binding protein 4 as an adipokine that regulates insulin secretion during obesity
Source: PubMed Central journal article supplement — Mol Metab. 2014 Mar 14;3(4):465–73. doi: 10.1016/j.molmet.2014.02.005 (PMC4060222; doi:10.1016/j.molmet.2014.02.005), 2014-03-14
Supplement: mmc3.pdf [file mmc3.pdf]

**Table S2a, related to Figure 3**

| Physiological Parameter                                     | Pearson correlation with log serum FABP4 |                |      |
|-------------------------------------------------------------|------------------------------------------|----------------|------|
|                                                             | Correlation                              | <i>P</i> value |      |
| Body mass index (kg/m <sup>2</sup> )                        | 0.623                                    | 0.0076         | **   |
| Body fat (%)                                                | 0.827                                    | 0.0001         | **** |
| Fat mass (kg)                                               | 0.689                                    | 0.0031         | **   |
| Fat free mass (kg)                                          | -0.663                                   | 0.0051         | **   |
| Abdominal fat (kg)                                          | 0.525                                    | 0.0369         | *    |
| Fasting insulin (log pmol/l)                                | 0.473                                    | 0.0550         | ns   |
| Glucose-stimulated insulin secretion (AUC; pmol/l x 60min)  | 0.567                                    | 0.0177         | *    |
| Glucose-stimulated insulin secretion (iAUC; pmol/l x 60min) | 0.549                                    | 0.0224         | *    |
| Glucose tolerance (AUC; mmol/l x 60min)                     | 0.042                                    | 0.8721         | ns   |
| Glucose tolerance (iAUC; mmol/l x 60min)                    | 0.151                                    | 0.5618         | ns   |

**Table S2b, related to Figure 3**

| Dependent variable                                           | Model             | Standardized $\beta$ | <i>P</i> | Adjusted R <sup>2</sup> |
|--------------------------------------------------------------|-------------------|----------------------|----------|-------------------------|
| Glucose-stimulated insulin secretion (AUC; pmol/l x 60 min)  | *Log serum FABP4  | 0.587                | 0.017    | 0.298                   |
| Glucose-stimulated insulin secretion (iAUC; pmol/l x 60 min) | *Log serum FABP4  | 0.570                | 0.021    | 0.277                   |
| Glucose-stimulated insulin secretion (AUC; pmol/l x 60 min)  | **Log serum FABP4 | 0.567                | 0.018    | 0.276                   |
| Glucose-stimulated insulin secretion (iAUC; pmol/l x 60 min) | **Log serum FABP4 | 0.549                | 0.022    | 0.255                   |
