# Supplementary figures and images for: Identification of fatty acid binding protein 4 as an adipokine that regulates insulin secretion during obesity
Source: PubMed Central journal article supplement — Mol Metab. 2014 Mar 14;3(4):465–73. doi: 10.1016/j.molmet.2014.02.005 (PMC4060222; doi:10.1016/j.molmet.2014.02.005), 2014-03-14

**Figure S1, related to Figure 2**

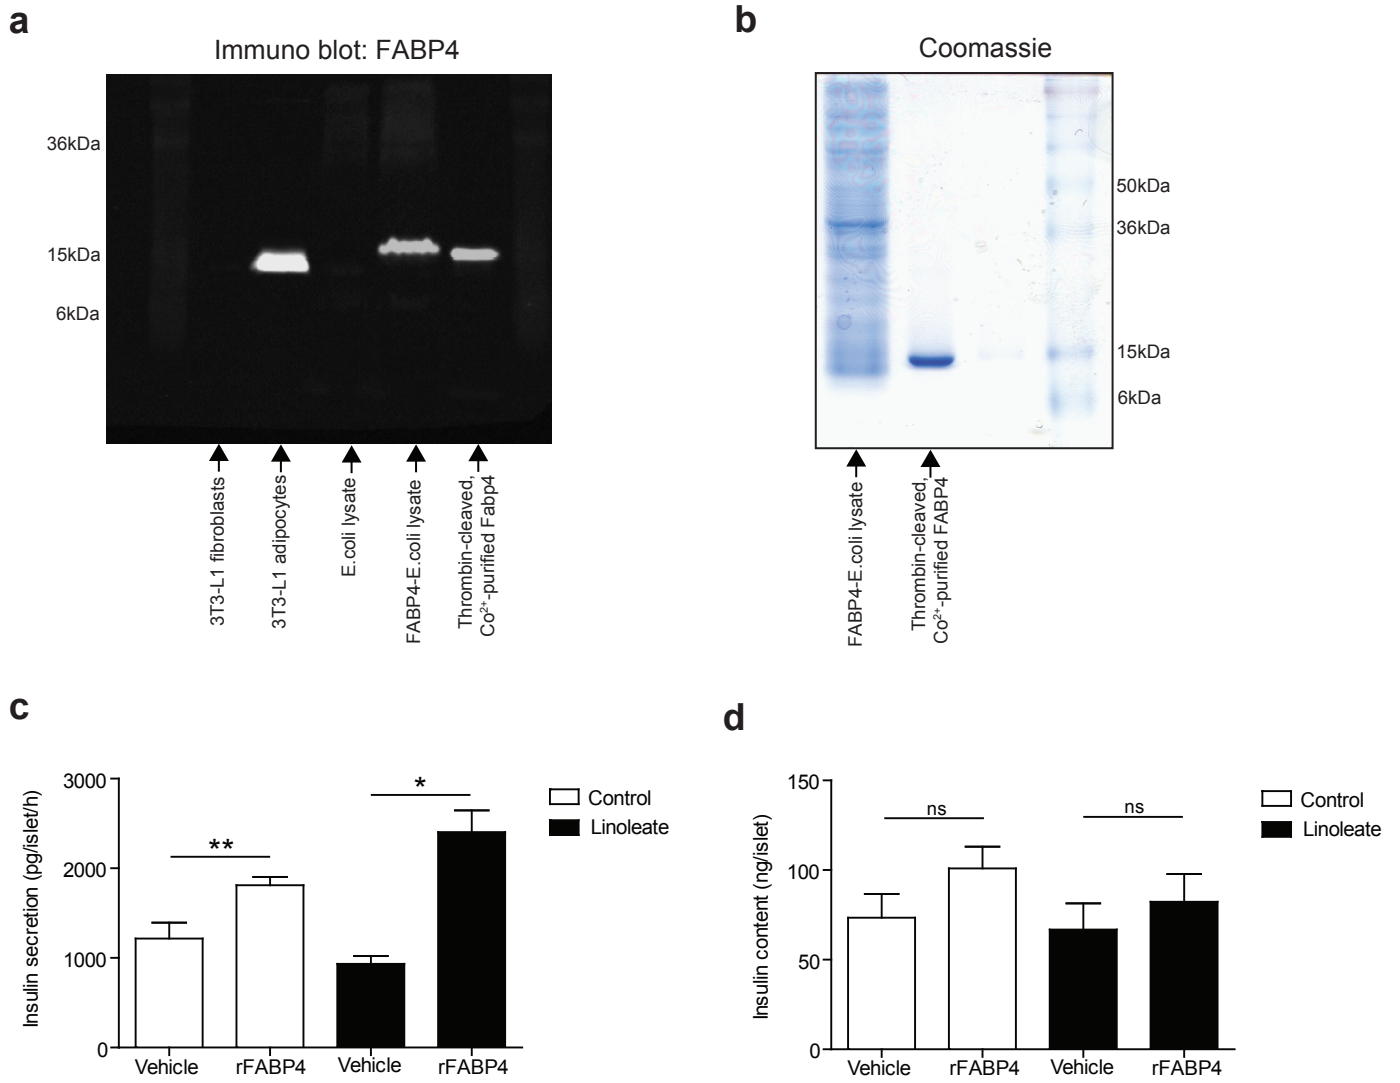

Supplement: mmc4.pdf [file mmc4.pdf]
